# Supplementary material for: Technical Note: The Modular Earth Submodel System (MESSy) - a new approach towards Earth System Modeling
Source: Copernicus journal article supplement (doi:10.5194/acp-5-433-2005), 2005-02-10
Supplement: Supplementary file 1 [file acp-5-433-2005-supplement.zip]

## SHELL-SCRIPTS

```

eccham (tsh-script):
./configure
gmake
cd data
...messy/xmessy

messy/xmessy (sh-script):
...
USE_XXX=true
NML_XXX=xxx.nml
NML_XXX_T=xxx.tnml
...
# ECHAM5.nml
# MESSY.nml
# xxx.nml
# xxx.tnml
...
# run the model

```

## NAMELISTS

```

ECHAM5.nml:
MESSY.nml:
CHECK = .true.
USE_XXX = .true.
...
xxx.tnml:
&CTRL
...
&REGRID
...
xxx.nml:
&CTRL
...
&REGRID
...
&RGTEVENTS
...
&REGRID
...
&REGRID
...

```

## BASE MODEL LAYER (CALL TREE)

```

master (src/master.f90)
p_start (modules/mo_mpi.f90)
control (src/control.f90)
initrd (modules/mo_start_dataset.f90)
...
initialize (src/initialize.f90)
...
messy_initialize
messy_new_tracer (src/call_submodels.f90)
init_geoloc (modules/mo_geoloc.f90)
...
init_memory (modules/mo_memory_streams.f90)
messy_init_memory
...
ioinitial (src/initial.f90) / iorestart (src/iorestart.f90)
...
messy_init_tracer (src/call_submodels.f90)
...
messy_init_coupling
stepon (src/stepon.f90)
...
scan1 (src/scan1.f90)
m_buiscan; m_buisc1
sym2 ... cwd ... fti ... dyn ... f2 ...
...
messy_global_start
<ADVECTION>
...
tfl
m_bufrow(row)
messy_local_start
gpc (src/gpc.f90)
physc (src/physc.f90)
...
cover
radiation
vdiff
...
messy_vdiff
...
surf temp
...
radheat
gspectrum
swo drag
eccham_messy_convect
cloud
...
surf
lake
licetemp
m_ocean
sicetemp
collect
hydrology_collect
messy_physc
...
messy_local_end
si1
...
ftfl ... si2 ... sym1 ... ld ...
...
messy_global_end
...
out_streams (mo_grib.f90)
scan2 ...
write_streams (mo_io.f90)
...
free_memory (modules/mo_memory_streams.f90)
messy_free_memory
...
p_stop (modules/mo_mpi.f90)

```

color-legend:  
ECHAM5 specific  
MESSY-convention  
NCREGRID-interface  
Files

namelist  
TIME LOOP  
REGION LOOP  
GENERIC SUBMODEL

## BASE MODEL INTERFACE LAYER

```

messy/e5/messy_main_control_e5.f90
SUBROUTINE messy_initialize
USE messy_main_switch
USE messy_main_switch_e5, ONLY: main_initialize
USE messy_xxx_e5, ONLY: xxx_initialize
...
CALL main_initialize
...
IF (USE_XXX) CALL xxx_init
...
END SUBROUTINE messy_initialize

SUBROUTINE messy_new_tracer
USE messy_main_switch
USE messy_main_tracer_e5, ONLY: main_tracer_new_tracer
USE messy_xxx_e5, ONLY: messy_new_tracer
...
CALL main_tracer_new_tracer(1)
...
IF (USE_XXX) CALL xxx_new_tracer
...
CALL main_tracer_new_tracer(2)
...
END SUBROUTINE messy_new_tracer

SUBROUTINE messy_init_memory
USE messy_main_switch
USE messy_main_data_e5, ONLY: main_data_init_memory
USE messy_main_tracer_e5, &
ONLY: main_tracer_init_memory
USE messy_xxx_e5, ONLY: xxx_init_memory
...
CALL main_tracer_init_memory
CALL main_data_init_memory
...
IF (USE_XXX) CALL xxx_init_memory
...
END SUBROUTINE messy_init_memory

SUBROUTINE messy_init_tracer
USE messy_main_switch
USE messy_main_tracer_e5, ONLY: main_tracer_init_tracer
USE messy_xxx_e5, ONLY: xxx_init_tracer
...
CALL main_tracer_init_tracer(1)
IF (USE_XXX) CALL xxx_init_tracer
...
CALL main_tracer_init_tracer(2)
...
END SUBROUTINE messy_init_tracer

SUBROUTINE messy_init_coupling
USE messy_main_switch
USE messy_xxx_e5, ONLY: xxx_init_coupling
...
IF (USE_XXX) CALL xxx_init_coupling
...
END SUBROUTINE messy_init_coupling

SUBROUTINE messy_global_start
USE messy_main_switch
USE messy_xxx_e5, ONLY: xxx_global_start
...
IF (USE_XXX) CALL xxx_global_start
...
END SUBROUTINE messy_global_start

SUBROUTINE messy_local_start
USE messy_main_switch
USE messy_xxx_e5, ONLY: xxx_local_start
...
IF (USE_XXX) CALL xxx_local_start
...
END SUBROUTINE messy_local_start

SUBROUTINE messy_vdiff, convect, physc
USE messy_main_switch
USE messy_xxx_e5, ONLY: xxx_vdiff, convect, physc
...
IF (USE_XXX) CALL xxx_vdiff, convect, physc
...
END SUBROUTINE messy_vdiff, convect, physc

SUBROUTINE messy_local_end
USE messy_main_switch
USE messy_xxx_e5, ONLY: xxx_local_end
...
IF (USE_XXX) CALL xxx_local_end
...
END SUBROUTINE messy_local_end

SUBROUTINE messy_global_end
USE messy_main_switch
USE messy_xxx_e5, ONLY: xxx_global_end
...
IF (USE_XXX) CALL xxx_global_end
...
END SUBROUTINE messy_global_end

SUBROUTINE messy_free_memory
USE messy_main_switch
USE messy_main_tracer_e5, ONLY: &
main_tracer_free_memory
USE messy_xxx_e5, ONLY: xxx_free_memory
...
CALL main_tracer_free_memory
...
END SUBROUTINE messy_free_memory

```

## GENERIC SUBMODELS INTERFACE / CORE LAYER

```

messy/e5/messy_main_data_e5.f90
MODULE MESSY_MAIN_DATA_E5
! DATA TRANSFER VIA stream-elements
! BETWEEN ECHAM5 and MESSY-SUBMODELS
! AND BETWEEN MESSY-SUBMODELS
END MODULE MESSY_MAIN_DATA_E5

messy/e5/messy_main_transform_e5.f90
MODULE MESSY_MAIN_TRANSFORM_E5
! SUBROUTINES FOR
! TRANSDITION AND TRANSFORMATIONS
! BETWEEN DIFFERENT REPRESENTATIONS
! (GRIDPOINT, LAGRANGE, SPECTRAL,
! LEGENDRE, FOURIER, ...)
END MODULE MESSY_MAIN_TRANSFORM_E5

messy/e5/messy_main_switch_e5.f90
MODULE MESSY_MAIN_SWITCH_E5
USE messy_main_switch
USE messy_xxx, ONLY: modstr_xxx => modstr &
modstr_xxx => modver
CONTAINS
SUBROUTINE main_initialize
USE ...
IF (p_parallel_io) THEN
iou = find_next_free_unit(100,200)
CALL messy_main_read_nml(status, iou)
IF (status /= 0) CALL finish(substr)
END IF
CALL p_bcast(USE_XXX)
...
CALL read_nml_open(..., iou, CTRL, modstr)
...
READ(iou, NML=CTRL)
call read_nml_check(..., iou, CTRL, modstr)
...
call read_nml_close(..., iou, modstr)
status = 0
END SUBROUTINE main_initialize
END MODULE MESSY_MAIN_SWITCH_E5

messy/e5/messy_main_tools_e5.f90
MODULE MESSY_MAIN_TOOLS_E5
CONTAINS
SUBROUTINE start_message_e5
SUBROUTINE end_message_e5
SUBROUTINE zonal_average
...
END MODULE MESSY_MAIN_TOOLS_E5

messy/e5/messy_main_tracer_mem_e5.f90
MODULE MESSY_MAIN_TRACER_MEM_E5
USE messy_main_tracer
CHARACTER(LEN=*) PARAMETER :: &
GPTRSTR = 'gptrac' &
LGTRSTR = 'lgtrac'
TYPE(t_trinfo, ip), DIMENSION(:), POINTER :: &
ti_gp, ti_lg
INTEGER :: ntrac_gp, ntrac_lg
REAL(DP), DIMENSION(:,:), POINTER :: &
pxt_a, pxtc_a, pxm1_a, pxtf_a
REAL(DP), DIMENSION(:,:), POINTER :: &
xt, xtc, xtm1_a, xtf_a
END MODULE MESSY_MAIN_TRACER_MEM_E5

messy/e5/messy_main_tracer_e5.f90
MODULE MESSY_MAIN_TRACER_E5
USE messy_main_tracer
CONTAINS
SUBROUTINE main_tracer_new_tracer
SUBROUTINE main_tracer_init_memory
SUBROUTINE main_tracer_free_memory
SUBROUTINE tracer_init
SUBROUTINE tracer_halt
END MODULE MESSY_MAIN_TRACER_E5

messy/e5/messy_ncrgrid_tools_e5.f90
MODULE MESSY_NCREGRID_TOOLS_E5
TYPE RGTEVENT
SUBROUTINE RGTEVENT_INIT_NML
SUBROUTINE RGTEVENT_READ
SUBROUTINE RGTEVENT_STATUS
SUBROUTINE RGTEVENT_READ_NCVAR
SUBROUTINE RGTEVENT_READ_NCFILE
END MODULE MESSY_NCREGRID_TOOLS_E5

messy/src/messy_main_constants_mem.f90
MODULE MESSY_MAIN_CONSTANTS_MEM
CHARACTER(LEN=*) PARAMETER :: &
modstr = 'MESSY', &
modver = '0.1e'
INTEGER :: PARAMETER :: &
SP = selected_real_kind(12, 307), &
DP = selected_real_kind(14), &
WP = DP, &
modt = 6, &
nerr = 6
REAL(DP), PARAMETER :: ...
END MODULE MESSY_MAIN_CONSTANTS_MEM

messy/src/messy_main_switch.f90
MODULE MESSY_MAIN_SWITCH
USE messy_main_constants_mem, ONLY: &
i4, modstr
LOGICAL, PARAMETER, PUBLIC :: &
CHECK = .true., &
USE_XXX = .false. &
NAMELIST / CTRL CHECK, &
... USE_XXX ...
CONTAINS
SUBROUTINE messy_main_read_nml(status, iou)
status = 1
call read_nml_open(..., iou, CTRL, modstr)
...
READ(iou, NML=CTRL)
call read_nml_check(..., iou, CTRL, modstr)
...
call read_nml_close(..., iou, modstr)
status = 0
END SUBROUTINE messy_main_read_nml
END MODULE MESSY_MAIN_SWITCH

messy/src/messy_main_tools.f90
MODULE MESSY_MAIN_TOOLS
TYPE PTR_ND_ARRAY (N=1 ... 5)
...
CONTAINS
SUBROUTINE read_nml_open
SUBROUTINE read_nml_close
SUBROUTINE read_nml_check
SUBROUTINE start_message, end_message
SUBROUTINE iso2ind, ind2val
SUBROUTINE int2str
SUBROUTINE strtrack
END MODULE MESSY_MAIN_TOOLS

messy/src/messy_main_tracer.f90
MODULE MESSY_MAIN_TRACER
TYPE t_trinfo
TYPE t_trinfo_list
TYPE t_tracer_set
...
CONTAINS
SUBROUTINE new_tracer_set
SUBROUTINE get_tracer_set
SUBROUTINE get_tracer_set_id
SUBROUTINE setup_tracer_set
SUBROUTINE clean_tracer_set
SUBROUTINE print_tracer_set
SUBROUTINE print_tracer_set_val
SUBROUTINE get_tracer
SUBROUTINE tracer_error_str
END MODULE MESSY_MAIN_TRACER

messy/src/messy_ncrgrid_tools.f90
MODULE MESSY_NCREGRID_TOOLS
TYPE NCRGCNT
CONTAINS
SUBROUTINE RGTOOL_READ_NCVAR
SUBROUTINE RGTOOL_READ_NCFILE
SUBROUTINE RGTOOL_CONVERT
SUBROUTINE RGTOOL_G2C
SUBROUTINE RGTOOL_NCRGNT_RST
END MODULE MESSY_NCREGRID_TOOLS

messy/e5/messy_ncrgrid_tools_e5.f90
MODULE MESSY_NCREGRID_TOOLS_E5
TYPE RGTEVENT
SUBROUTINE RGTEVENT_INIT_NML
SUBROUTINE RGTEVENT_READ
SUBROUTINE RGTEVENT_STATUS
SUBROUTINE RGTEVENT_READ_NCVAR
SUBROUTINE RGTEVENT_READ_NCFILE
END MODULE MESSY_NCREGRID_TOOLS_E5

```

## SUBMODEL INTERFACE LAYER

```

messy/e5/messy_xxx_e5.f90
MODULE messy_xxx_e5
USE messy_xxx ! SUBMODEL CORE LAYER
USE messy_ncrgrid_tools_e5, ONLY: RGTEVENT
IMPLICIT NONE
PRIVATE
PUBLIC :: xxx_initialize, xxx_new_tracer, xxx_init_memory, xxx_init_tracer, &
xxx_init_coupling, xxx_global_start, xxx_local_start, xxx_vdiff, xxx_convect, &
xxx_physc, xxx_local_end, xxx_global_end, xxx_free_memory
!PRIVATE :: xxx_read_nml_e5
! GLOBAL PARAMETERS / VARIABLES / CPL-SWITCHES
TYPE(RGTEVENT), DIMENSION(:), POINTER :: RGT
CONTAINS
SUBROUTINE xxx_initialize
USE mo_filename, ONLY: find_next_free_unit
USE mo_mpi, ONLY: p_parallel_io, p_bcast, p_io
USE mo_exception, ONLY: finish
USE messy_ncrgrid_tools_e5, ONLY: rgtevent_init_nml
IMPLICIT NONE
CHARACTER(LEN=*) PARAMETER :: substr='xxx_initialize'
INTEGER :: status, iou
...
IF (p_parallel_io) THEN
iou = find_next_free_unit(100,200)
CALL xxx_read_nml(status, iou)
IF (status /= 0) CALL finish(substr, ...)
END IF
CALL p_bcast(..., p_io) ! BROADCAST NAMELIST
IF (p_parallel_io) THEN
iou = find_next_free_unit(100,200)
CALL xxx_read_nml_e5(status, iou) ! READ / CTRL
IF (status /= 0) CALL finish(substr, ...)
END IF
CALL p_bcast(..., p_io) ! BROADCAST NAMELIST
...
CALL rgtevent_init_nml(RGT, modstr) ! read /RGTEVENTS/ in xxx.nml; -> xxx.rst
END SUBROUTINE xxx_initialize

SUBROUTINE xxx_new_tracer
USE messy_main_tracer, ONLY: GPTRSTR, LGTRSTR
USE messy_main_tracer, ONLY: get_tracer, new_tracer, TR_NEXIST
USE messy_main_tracer, ONLY: tracer_halt
IMPLICIT NONE
CHARACTER(LEN=*) PARAMETER :: substr='xxx_new_tracer'
INTEGER :: status
CALL get_tracer(status, GPTRSTR, ...)
IF (status == TR_NEXIST) THEN
CALL new_tracer(status, GPTRSTR, ...)
ELSE
CALL tracer_halt(substr, status)
END IF
END SUBROUTINE xxx_new_tracer

SUBROUTINE xxx_init_memory
USE mo_memory_base, ONLY: t_stream, new_stream, add_stream_element
IMPLICIT NONE
CHARACTER(LEN=*) PARAMETER :: substr='xxx_init_memory'
TYPE(t_stream), POINTER :: stream
...
CALL new_stream(stream, modstr)
...
CALL add_stream_element(stream, <GLOBAL POINTER>, ...)
...
ALLOCATE(...) ! GLOBAL NON-STREAM-FIELDS
...
END SUBROUTINE xxx_init_memory

SUBROUTINE xxx_init_tracer
USE messy_main_tracer_e5, ONLY: tracer_init
IMPLICIT NONE
...
CALL tracer_init(modstr) ! read /REGRID/ in xxx.tnml
END SUBROUTINE xxx_init_tracer

SUBROUTINE xxx_init_coupling
USE messy_main_tracer, ONLY: get_tracer
USE mo_memory_base, ONLY: t_stream, get_stream, get_stream_element
END SUBROUTINE xxx_init_coupling

SUBROUTINE xxx_global_start
USE messy_ncrgrid_tools_e5, ONLY: ...
IMPLICIT NONE
CALL ... ! read /REGRID/ in xxx.nml; update xxx.rst
END SUBROUTINE xxx_global_start

SUBROUTINE xxx_local_start, xxx_vdiff, xxx_convect, xxx_physc, xxx_local_end
USE mo_exception, ONLY: finish
USE [ECHAM5, MESSY]: ONLY: ...
IMPLICIT NONE
CHARACTER(LEN=*) PARAMETER :: substr='xxx...'
INTEGER :: status
...
CALL xxx_<SMCL-routine>(status, ...)
IF (status /= 0) CALL finish(substr, ...)
END SUBROUTINE xxx_local_start, xxx_vdiff, xxx_convect, xxx_physc, xxx_local_end

SUBROUTINE xxx_global_end
IMPLICIT NONE
CALL ...
END SUBROUTINE xxx_global_end

SUBROUTINE xxx_free_memory
IMPLICIT NONE
DEALLOCATE(...) ! GLOBAL NON-STREAM-FIELDS
END SUBROUTINE xxx_free_memory
! ... to be continued on next page

```

SUBMODEL INTERFACE LAYER  
(continued)

messy/e5/messy\_XXX\_e5.f90

```
! ... continued

SUBROUTINE xxx_read_nml_e5(status, iou) ! PRIVATE
USE mo_mz_messy_tools, ONLY: read_nml_open, read_nml_check, read_nml_close
IMPLICIT NONE
! I/O
INTEGER, INTENT(OUT) :: status
INTEGER, INTENT(IN) :: iou
! LOCAL
CHARACTER(LEN=*) , PARAMETER :: substr = 'xxx_read_nml_e5'
LOGICAL :: lex ! file exists ?
INTEGER :: fstat ! file status

NAMELIST /CPL/ ... ! ECHAM5 specific GLOBAL PARAMETERS / SWITCHES

status = 1 ! ERROR

CALL read_nml_open(lex, substr, iou, 'CPL', modstr)
IF (.NOT. lex) RETURN
READ(iou, NML=CPL, IOSTAT=fstat)
CALL read_nml_check(fstat, substr, iou, 'CPL', modstr)
IF (fstat /= 0) RETURN

! CHECK NAMELIST AND DIAGNOSTIC OUTPUT
...
CALL read_nml_close(substr, iou, modstr)
status = 0 ! NO ERROR
END SUBROUTINE xxx_read_nml_e5

END MODULE messy_XXX_e5
```

SUBMODEL CORE LAYER

messy/src/messy\_XXX.f90:

```
MODULE MESSY_XXX
IMPLICIT NONE
PRIVATE
CHARACTER(LEN=*) , PARAMETER, PUBLIC :: &
    modstr='xxx', modver='1.0a'
...
PUBLIC :: xxx_read_nml
PUBLIC :: xxx_sub_01
PUBLIC :: ...
...
! PRIVATE :: xxx_sub_sub_01
! PRIVATE :: ...
...
! GLOBAL PARAMETERS / SWITCHES
! GLOBAL VARIABLES

CONTAINS

SUBROUTINE xxx_read_nml(status, iou)

USE mo_mz_messy_tools, ONLY: read_nml_open, read_nml_check, read_nml_close
IMPLICIT NONE
! I/O
INTEGER, INTENT(OUT) :: status
INTEGER, INTENT(IN) :: iou
! LOCAL
CHARACTER(LEN=*) , PARAMETER :: substr = 'xxx_read_nml'
LOGICAL :: lex ! file exists ?
INTEGER :: fstat ! file status

NAMELIST /CPL/ ... ! GLOBAL ...
! ... PARAMETERS / SWITCHES

status = 1 ! ERROR

CALL read_nml_open(lex, substr, iou, 'CTRL', modstr)
IF (.NOT. lex) RETURN
READ(iou, NML=CTRL, IOSTAT=fstat)
CALL read_nml_check(fstat, substr, iou, 'CTRL', modstr)
IF (fstat /= 0) RETURN

! CHECK NAMELIST AND DIAGNOSTIC OUTPUT
...
CALL read_nml_close(substr, iou, modstr)
status = 0 ! NO ERROR
END SUBROUTINE xxx_read_nml

...

SUBROUTINE xxx_sub_01(status, ...)
IMPLICIT NONE
! I/O
INTEGER, INTENT(OUT) :: status = 1
...
CALL xxx_sub_sub_01(...)
IF (ERROR) RETURN
...
status = 0
END SUBROUTINE xxx_sub_01

...

SUBROUTINE xxx_sub_sub_01(...)
IMPLICIT NONE
...
END SUBROUTINE xxx_sub_sub_01

...
END MODULE MESSY_XXX
```

... VIA PARAMETER LIST

CALL xxx\_sub\_sub\_01(...)

IF (ERROR) RETURN
