# Supplementary material for: Technical Note: The Modular Earth Submodel System (MESSy) - a new approach towards Earth System Modeling
Source: Copernicus journal article supplement (doi:10.5194/acp-5-433-2005), 2005-02-10
Supplement: Supplementary file 3 [file acp-5-433-2005-supplement.zip]

Archive with 2 entries (2 files):
- messy_echam5.pdf
- messy_echam5_ref.pdf
